# Supplementary material
Source: PubMed Central journal article supplement (PMC4478209)
Supplement: NIHMS683215-supplement-Supp_FigureS1-S7.pdf [file NIHMS683215-supplement-Supp_FigureS1-S7.pdf]

Fig. S1

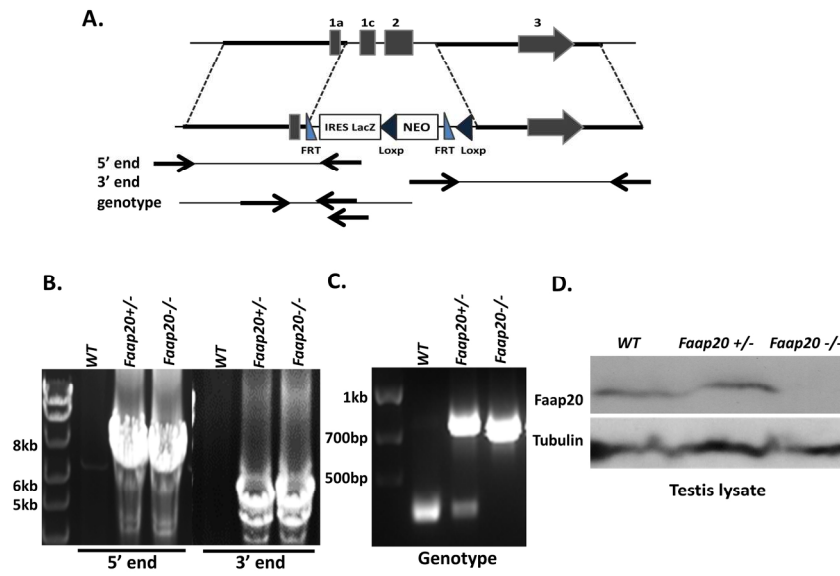

190x142mm (300 x 300 DPI)

Fig. S2

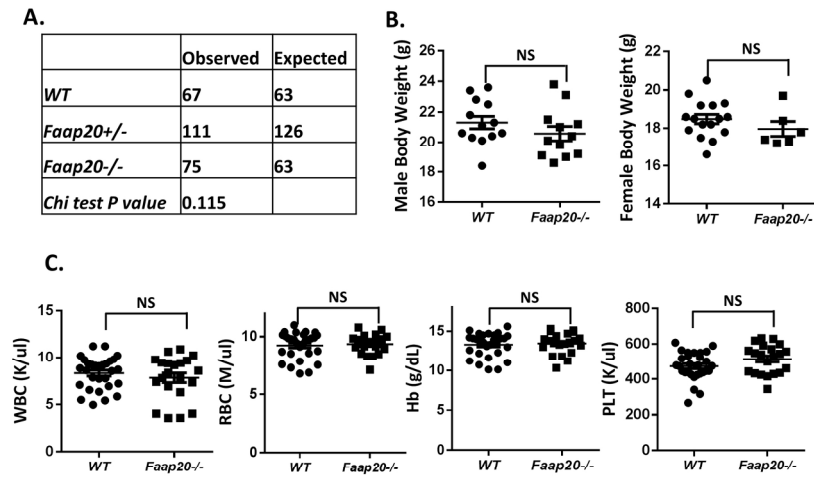

190x142mm (300 x 300 DPI)

Fig. S3

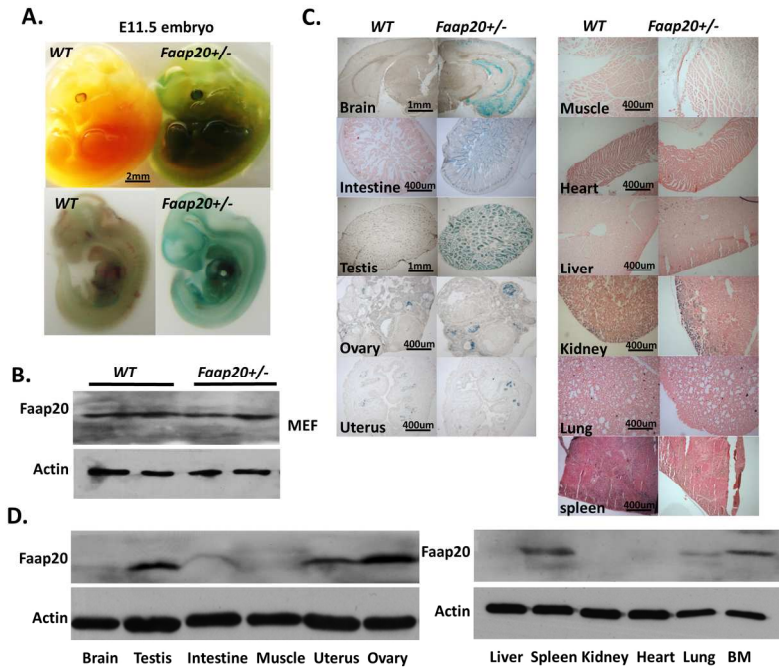

190x142mm (300 x 300 DPI)

Fig. S4

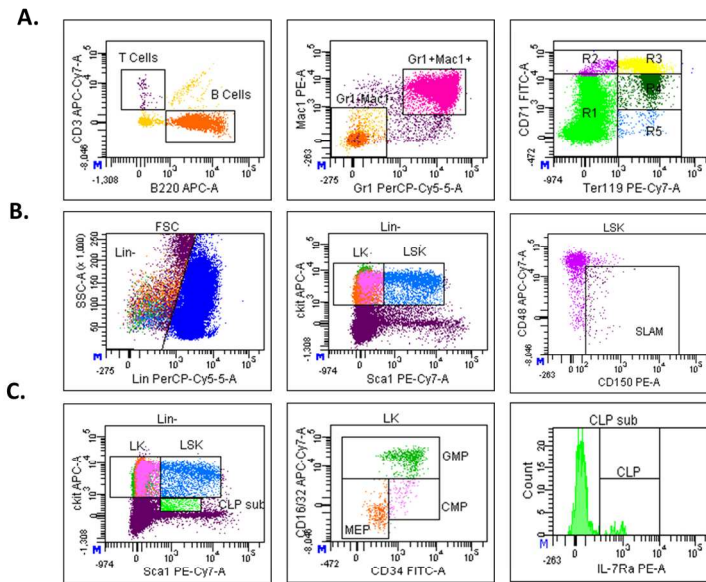

190x142mm (300 x 300 DPI)

Fig. S5

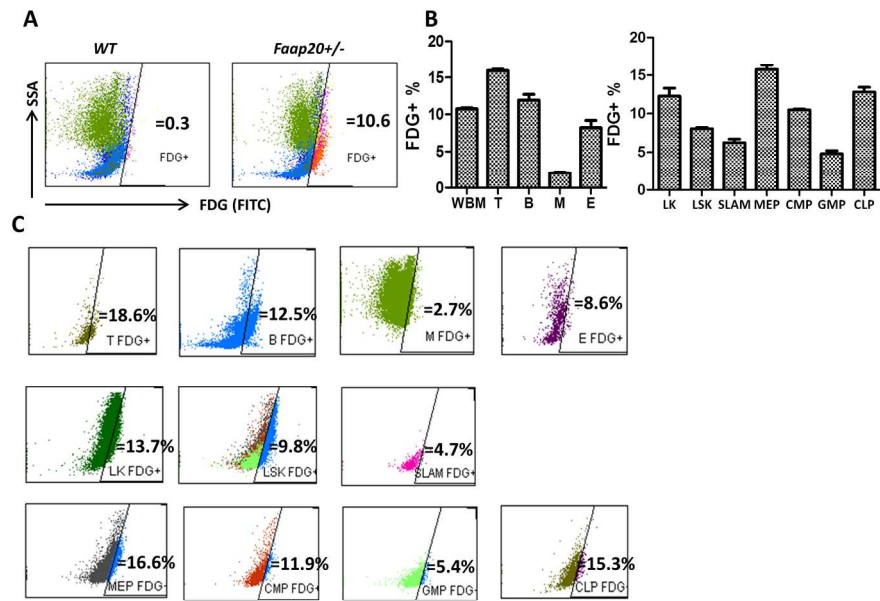

190x142mm (300 x 300 DPI)

Fig. S6

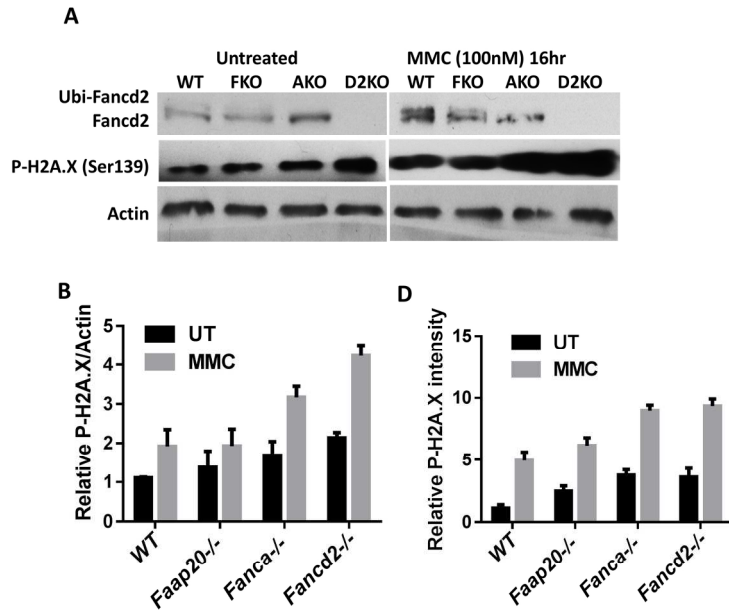

190x142mm (300 x 300 DPI)

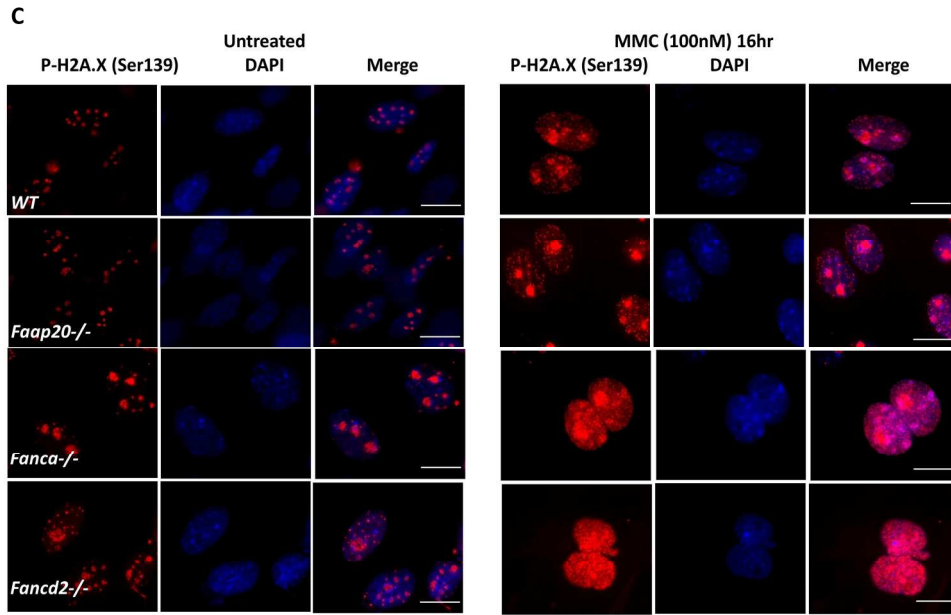

190x142mm (300 x 300 DPI)

Fig. S7

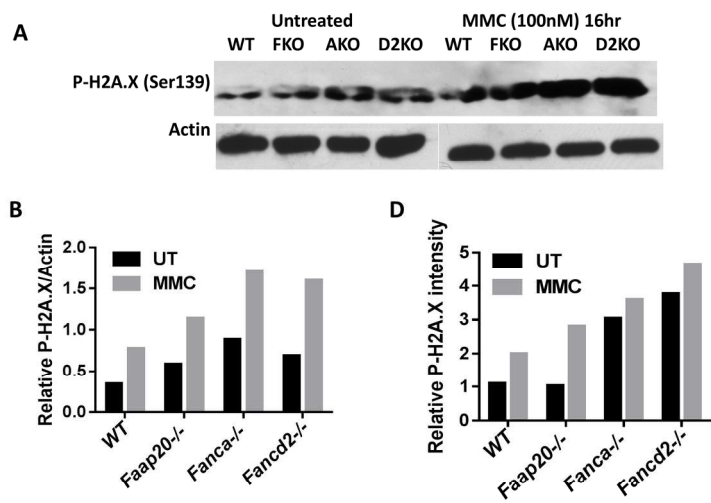

190x142mm (300 x 300 DPI)



C

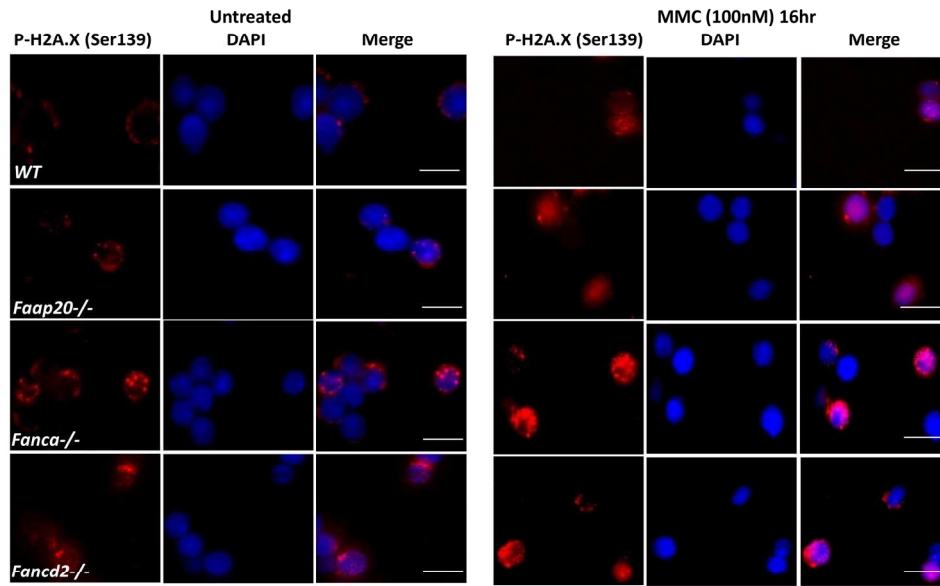

190x142mm (300 x 300 DPI)
